# Supplementary material
Source: publisher figshare collection journal article supplement (https://tandf.figshare.com/ndownloader/files/17211440)
Supplement: Supplementary file 1 [file 17211440]

Supplementary Table S1

Qualitative evaluations by the Swedish speaking SLP (SW-SLP) and Arabic speaking SLP (AR-SLP) of the seven participants' performance in the dimension "Respiration and phonation".

|                                                   | Participant 1                                |                                                         | Participant 2                                |                                                                   | Participant 3                 |                     | Participant 4                    |                                              | Participant 5                            |                                              | Participant 6                      |                                | Participant 7                          |                               |
|---------------------------------------------------|----------------------------------------------|---------------------------------------------------------|----------------------------------------------|-------------------------------------------------------------------|-------------------------------|---------------------|----------------------------------|----------------------------------------------|------------------------------------------|----------------------------------------------|------------------------------------|--------------------------------|----------------------------------------|-------------------------------|
| Respiration and phonation – qualitative valuation | SW-SLP                                       | AR-SLP                                                  | SW-SLP                                       | AR-SLP                                                            | SW-SLP                        | AR-SLP              | SW-SLP                           | AR-SLP                                       | SW-SLP                                   | AR-SLP                                       | SW-SLP                             | AR-SLP                         | SW-SLP                                 | AR-SLP                        |
| <i>Tired or out of breath when talking</i>        | Yes                                          | Yes                                                     | No                                           | No                                                                | No                            | No                  | Yes                              | Yes                                          | Yes                                      | Yes                                          | Yes                                | No                             | Yes                                    | Yes                           |
| <i>Rate of breathing when talking</i>             | Quick, irregular                             | Irregular                                               | Normal                                       | Irregular                                                         | Normal                        | Normal              | Quick                            | Normal                                       | Slow, irregular                          | Slow                                         | Normal                             | Normal                         | Normal                                 | Normal                        |
| <i>Forced inspiration-expiration</i>              | No                                           | Forced inspiration                                      | No                                           | Forced inspiration                                                | No                            | Forced inspiration  | No                               | Forced inspiration                           | No                                       | No                                           | No                                 | Forced inspiration             | No                                     | No                            |
| <i>Loudness</i>                                   | Low, monoloudness loudness decay             | Low. mono-loudness                                      | Normal                                       | Low, loudness decay                                               | Normal                        | Normal              | Low, monoloudness loudness decay | Low, loudness decay                          | Low, mono-loudness                       | Low, mono-loudness                           | Low                                | Low                            | Low, loudness decay                    | Low                           |
| <i>Pitch level</i>                                | Low, monopitch                               | Low, monopitch                                          | Normal                                       | Low                                                               | Normal                        | Low                 | Low, monopitch                   | Low, unstable                                | Pitch fluctuation, monopitch             | Low                                          | Normal                             | Normal                         | Low                                    | Low, monopitch                |
| <i>Voice quality in sustained phonation</i>       | Unstable, strained, vocal fry, breathy voice | Unstable, strained, strangled, vocal fry, breathy voice | Unstable, strained, vocal fry, breathy voice | Unstable, strained, strangled, harshness, vocal fry, pitch brakes | Unstable, strained, harshness | Unstable, vocal fry | Unstable, strained, harshness    | Unstable, harshness vocal fry, breathy voice | Unstable, strained, strangled, harshness | Unstable, strained, Harshness, breathy voice | Unstable, vocal fry, breathy voice | Unstable, harshness, vocal fry | Strained, harshness, vocal fry, tremor | Unstable, strained, harshness |
| <i>Voice quality in connected speech</i>          | Strained, vocal fry, breathy voice           | Strained, harshness, breathy voice                      | Vocal fry, breathy voice                     | Strained, harshness, vocal fry                                    | Normal                        | Vocal fry           | Strained, harshness              | Harshness, vocal fry                         | Strained, strangled, harshness           | Harshness, vocal fry, breathy voice          | Vocal fry, breathy voice           | Strained, strangled            | Strained, harshness, vocal fry         | Vocal fry, breathy voice      |

Note: "Tired or out of breath when talking" is a question to which the participants can answer "Yes" or "No"

Swedish speaking SLP (SW-SLP) and Arabic speaking SLP (AR-SLP) qualitative valuations of the seven participants performance in the dimension “Oromotor and velopharyngeal function”.

|                                                             | Participant 1                       |                                     | Participant 2                |                                              | Participant 3                 |                 | Participant 4 |           | Participant 5                                |           | Participant 6       |                 | Participant 7                                |                                     |
|-------------------------------------------------------------|-------------------------------------|-------------------------------------|------------------------------|----------------------------------------------|-------------------------------|-----------------|---------------|-----------|----------------------------------------------|-----------|---------------------|-----------------|----------------------------------------------|-------------------------------------|
| Oromotor and velopharyngeal function - qualitative measures | SW-SLP                              | AR-SLP                              | SW-SLP                       | AR-SLP                                       | SW-SLP                        | AR-SLP          | SW-SLP        | AR-SLP    | SW-SLP                                       | AR-SLP    | SW-SLP              | AR-SLP          | SW-SLP                                       | AR-SLP                              |
| <i>Face symmetry</i>                                        | Normal                              | Deviant right                       | Deviant left                 | Deviant left                                 | Normal                        | Normal          | Deviant left  | Normal    | Normal                                       | Normal    | Normal              | Normal          | Normal                                       | Normal                              |
| <i>Facial expression</i>                                    | Hypomimia                           | Hypomimia                           | Normal                       | Hypomimia                                    | Normal                        | Normal          | Hypomimia     | Normal    | Hypomimia                                    | Hypomimia | Normal              | Normal          | Hypomimia                                    | Hypomimia                           |
| <i>Drooling</i>                                             | Yes                                 | Yes                                 | Yes                          | No                                           | No                            | No              | No            | No        | No                                           | No        | No                  | No              | No                                           | No                                  |
| <i>Tongue</i>                                               | Atrophy, fasciculations             | Deviation right                     | Normal                       | Deviation left                               | Normal                        | Deviation right | Big, tremor   | Normal    | Normal size, deviation left, tremor          | Normal    | Normal              | Deviation right | Normal, tremor                               | Deviation, fasciculations           |
| <i>Tongue motor function</i>                                | Slow, reduced range of motion, weak | Slow, reduced range of motion, weak | Reduced range of motion      | Slow, uncoordinated, reduced range of motion | Reduced range of motion, weak | Normal          | Slow          | Slow      | Slow, uncoordinated, reduced range of motion | Slow      | Slow, uncoordinated | Normal          | Slow, uncoordinated, reduced range of motion | Slow, reduced range of motion, weak |
| <i>Diadochokinesis</i>                                      | Slow, imprecise articulation        | Slow, imprecise articulation        | Slow, imprecise articulation | Irregular, imprecise articulation            | Normal                        | Normal          | Slow          | Irregular | Slow, irregular, imprecise articulation      | Slow      | Normal              | Normal          | Slow, irregular, imprecise articulation      | Slow, irregular                     |

**Protocol for assessment of dysarthria in another language than Swedish**

Date: \_\_\_\_\_

*Instructions should in general, when applicable, be given in the same way as when administering the Swedish Dysarthria Assessment (Hartelius, 2015). Instructions may be repeated and the test-leader should model/say how the tasks should be performed. It is recommended to audio-record the assessment in order to be able listen after the session. You need a clock, pen and extra paper in case you need more space for notes than provided in the protocol. The interpreter also needs pen and paper to take notes. The interpreter fills out the 4-graded scale for assessment of listener comprehension. The test-person's significant other (if available) also fills out the 4-graded scale for assessment of listener comprehension. The participant rates the ability to make himself/herself understood using the 4-graded scale. You also need gloves, spatula and pen-flashlight for assessment of the oral cavity.*

**Instructions to the interpreter:** We are going to do an assessment of the person's speech. I want you to listen to if you can detect any speech sounds that sound differently than speech sounds that are intended to be produced. You also need to listen to if the speech sounds deviating in terms of intonation, speech rate, nasality, phrase length, pausing or if palilalia occurs (explain clearly to the interpreter what the different terms mean). You should also rate how easy or hard it is for you to understand the person's speech. Take notes if you notice something that deviates from the expected.

Code number \_\_\_\_\_ Age \_\_\_\_\_ Male/Female \_\_\_\_\_

Language \_\_\_\_\_ Years of education \_\_\_\_\_ Years in Sweden \_\_\_\_\_

Occupation \_\_\_\_\_ Diagnosis \_\_\_\_\_ Assessor \_\_\_\_\_

**Anamnestic information**

Native language (if other than the language the assessment is completed in)

Do you speak any other language?

Which language/s do you use the most?

If several languages are used - which one is the strongest?

Do you use different language in different contexts? School, work, at home, social situations?

## **Anamnestic information, continued**

### General condition

Orientation, eye-sight, hearing, mobility, other health problems?

### Speech problems

Do you think that your speech has changed?

When did it start? Number of months/weeks/days? \_\_\_\_\_

Did your speech problems have a sudden or gradual onset? Has your speech changed in any way since then?

Have you had speech problems earlier in your life? If so, when and what kind of speech problems?

What speech problems do you think that you have?

What is of most concern to you?

Where do you feel that the difficulties are located? Where would you place them (point to chest, larynx, mouth, head)?

Do the problems vary? In what way? (depending on time of day, emotions, general condition, different conversation partners, situations)

Does it happen that other people don't understand what you say?

How often? When?

What do you do then?

Does it help?

### Language problems

Self-perceived difficulties, for example with word-finding. In cases of multilingualism, better/worse in any of the languages?

### Swallowing problems? Describe how, when, what consistencies etc.

(goes down the wrong pipe, chokes often, coughs)

### Other information – smoking, living conditions, information from significant other?

**Inspection of the oral cavity – own teeth or other? Mucous membrane, excessive saliva/dry mouth, other observations of importance**

### **Respiration and phonation**

*Use the following scoring for the items where it is possible to make such an assessment. Circle the number you find is most appropriate:*

*0 = no or insignificant deviation*

*1 = mild deviation*

*2 = moderate deviation*

*3 = severe deviation or absence of function*

”Take a deep breath and sustain an ”sss” for as long as possible, like this”.

*(Model a sustained ”s” with normal force and flow for a few seconds. Three attempts, rate the best)*

**Sustain ”s” for as long as possible      Number of seconds: \_\_\_\_\_**

**0   1   2   3**

”Sustain an ”s” and increase strenght suddenly, as if someone pushed you in the stomach, I will show you: ssSS”. *(Three attempts, rate the best)*

**Increase strenght abruptly on ”s”:**

**0   1   2   3**

”Cough forcefully a couple of times, like this!”

**Cough**

**0   1   2   3**

”Take a deep breath and then sustain an ”a” evenly and with normal loudness, I will show you!”

*(Model a sustained ”a” with normal loudness and normal flow for a few seconds. Three attempts, rate the best).*

**Sustained ”a” for as long as possible      Number of seconds: \_\_\_\_\_**

**0   1   2   3**

”Sustain an ”a” and then increase loudness suddenly, as if someone pushed you in the stomach. I will show you: aaAA”.

*(Try to sustain the ”a” without changing anything but the loudness. Three attempts, rate the best).*

**Increase loudness abruptly on ”a”:**

**0   1   2   3**

## Respiration and phonation, continued

### Questions:

Do you get tired or out of breath when you speak?

Yes\_\_ No\_\_

Do you think you run out of air quickly?

Yes\_\_ No\_\_

Is it easier to breathe and speak .....

in upright position\_\_ lying down\_\_ no difference\_\_

### Description:

#### Posture, sitting

Normal \_\_\_\_  
Leaning forward \_\_\_\_  
Leaning left \_\_\_\_  
Leaning right \_\_\_\_  
Varying \_\_\_\_

#### Speech breathing

Normal \_\_\_\_  
High \_\_\_\_  
Shallow \_\_\_\_  
Uncoordinated \_\_\_\_

#### Breath-frequency in speech

Normal \_\_\_\_  
Rapid \_\_\_\_  
Slow \_\_\_\_  
Irregular \_\_\_\_

#### Inhalation/exhalation

Without stridor \_\_\_\_  
With stridor \_\_\_\_

#### Voice quality in sustained phonation

Normal \_\_\_\_  
Unstable \_\_\_\_  
Strained \_\_\_\_  
Strangled \_\_\_\_  
Harsh \_\_\_\_  
Gratings \_\_\_\_  
Vocal fry \_\_\_\_  
Breathy \_\_\_\_  
Diplophonic \_\_\_\_  
Tremulous \_\_\_\_  
Aphonic \_\_\_\_  
Pitch breaks \_\_\_\_

#### Voice quality in speech

Normal \_\_\_\_  
Unstable \_\_\_\_  
Strained \_\_\_\_  
Strangled \_\_\_\_  
Harsh \_\_\_\_  
Gratings \_\_\_\_  
Vocal fry \_\_\_\_  
Breathy \_\_\_\_  
Diplophonic \_\_\_\_  
Tremulous \_\_\_\_  
Aphonic \_\_\_\_  
Pitch breaks \_\_\_\_

#### Pitch

Normal \_\_\_\_  
High \_\_\_\_  
Low \_\_\_\_  
Monotone \_\_\_\_  
Unstable \_\_\_\_  
Decaying \_\_\_\_

#### Loudness in speech

Normal \_\_\_\_  
High \_\_\_\_  
Low \_\_\_\_  
Monotone \_\_\_\_  
Unstable \_\_\_\_

## Oral motor function

Model how to perform or produce the tasks. For syllable repetition the patient should first repeat slowly, model circa 2-4 “pa” (“ba” if Arabic), “ta”, “ka” per second for at least 3 seconds. Then model 6-7 “pa” (“ba” in Arabic), “ta”, and “ka” per second for at least 3 seconds. Model 0,5-1 “pa-ta-ka” (“ba-ta-ka” Arabic) for at least 3 seconds, after that 2-3 “pa-ta-ka” (“ba-ta-ka” if assessment in Arabic) per second. Instruct the person to sustain at least 5 seconds during the tasks assessing range of movement. For assessment of syllable repetition and diadochokineses two attempts are noted, rate the best one.

|                                                                                                                                                        |                                           |          |          |          |          |
|--------------------------------------------------------------------------------------------------------------------------------------------------------|-------------------------------------------|----------|----------|----------|----------|
| <b>”Pout your lips like this, I will show you”</b> (See instruction above. Three attempts, rate the best)                                              |                                           | <b>0</b> | <b>1</b> | <b>2</b> | <b>3</b> |
| <b>”Spread your lips, as in a big smile, like this, I will show you”</b> (See instruction above. Three attempts, rate the best)                        |                                           | <b>0</b> | <b>1</b> | <b>2</b> | <b>3</b> |
| <b>”Smack your lips like this, I will show you”</b> (See instruction above. Three attempts, rate the best)                                             |                                           | <b>0</b> | <b>1</b> | <b>2</b> | <b>3</b> |
| <b>”Say ”pa-pa-pa”, I will show you</b> (”ba-ba-ba” in Arabic. See instruction above) Calculate rate as syllables/second: _____                        |                                           | <b>0</b> | <b>1</b> | <b>2</b> | <b>3</b> |
| <b>”Stick out your tongue”</b> (See instruction above. Three attempts, rate the best)                                                                  |                                           | <b>0</b> | <b>1</b> | <b>2</b> | <b>3</b> |
| <b>”Stick your tongue at as far as you can to the right corner of your mouth, like this”</b><br>(See instruction above, Three attempts, rate the best) |                                           | <b>0</b> | <b>1</b> | <b>2</b> | <b>3</b> |
| <b>” Stick your tongue at as far as you can to the left corner of your mouth, like this”</b><br>(See instruction above, Three attempts, rate the best) |                                           | <b>0</b> | <b>1</b> | <b>2</b> | <b>3</b> |
| <b>”Move your tongue from side to side as quickly and evenly as possible, like this”</b> (Three attempts, rate the best)                               |                                           | <b>0</b> | <b>1</b> | <b>2</b> | <b>3</b> |
| <b>”Say ’ta-ta-ta’ evenly, like this”</b> (See instruction above)                                                                                      | Calculate rate as syllables/second: _____ | <b>0</b> | <b>1</b> | <b>2</b> | <b>3</b> |
| <b>”Say ’ka-ka-ka’ evenly, like this”</b> (See instruction above)                                                                                      | Calculate rate as syllables/second: _____ | <b>0</b> | <b>1</b> | <b>2</b> | <b>3</b> |
| <b>Say ‘pa-ta-ka-pa-ta-ka-pa-ta-ka’ evenly, like this”</b><br>(”ba-ta-ka” in Arabic. See instruction above)                                            | Calculate rate as syllables/second: _____ | <b>0</b> | <b>1</b> | <b>2</b> | <b>3</b> |

## Oral motor function, continued

### Description:

#### Facial symmetry

Normal —  
Abnormal left —  
Abnormal right —

#### Facial expression

Normal —  
Hypo-mimic —  
Hyper-mimic —

#### Diadochokinesis

Normal —  
Reduced rate —  
Uneven —  
Imprecise articulation —

#### Drooling

None —  
A little —  
A lot —

#### Tongue

Normal —  
Large —  
Atrophy left —  
Atrophy right —  
Deviation left —  
Deviation right —  
Fasciculations —  
Tremor —

#### Tongue motor function

Normal —  
Slow —  
Uncoordinated —  
Reduced range of motions —  
Reduced strength —  
Involuntary movements —

## Articulation

*For this task, the speech-language pathologist should rate if the articulation sounds deviating or not. Two attempts, rate the best.*

### Instruction to the patient:

”Now, say after me. You can produce each utterance twice”

#### Bilabial, nasal and plosive

po-po-po (bo-bo-bo)      **0   1   2   3**

ma-ma-ma      **0   1   2   3**

#### Labiodental fricative

fi-fi-fi      **0   1   2   3**

#### Alveolar plosive

to-to-to      **0   1   2   3**

#### Alveolar nasal

ni-ni-ni      **0   1   2   3**

#### Alveolar fricative

sa-sa-sa      **0   1   2   3**

#### Alveolar lateral approximant

lo-lo-lo      **0   1   2   3**

#### Palatal approximant

ja-ja-ja      **0   1   2   3**

#### Velar

ko-ko-ko      **0   1   2   3**

## Articulation continued

The following items should be answered by the interpreter, if possible, based on the conversation during anamnestic uptake and the test items completed. Also ask the interpreter if there are any/some sound that sound differently than the sounds intended to be produced. If there are deviations, are they present at the beginning, middle or end of the words? If there are for example nasal vowels in the language in question, ask the interpreter if any/some of them sound deviating and if so, which ones.

### Nasality

Normal —  
 Deviating —  
 Hypernasal —  
 Hyponasal —

### Articulatory difficulties

None —  
 Consistent —  
 Inconsistent —

### Irregular articulatory breakdowns

Not present —  
 Present —

### Prolonged speech sounds

Present —  
 Not present —

### Articulatory precision

Normal —  
 Indistinct —  
 Weak pressure —

### Distorted vowels

Present —  
 Not present —

### Possible deviating speech sounds based on the interpreter's impression:

Ask the interpreter to rate the overall deviation of articulation on the 4-graded scale

0 = no or insignificant deviation

1 = mild deviation

2 = moderate deviation

3 = severe deviation or absence of function

**0 1 2 3**

## Prosody (assessed by the interpreter)

**Instruction to the interpreter:** Here is a task that you don't have to translate. The reason is that you should focus on assessing possible deviations in the speech, with descriptions below. Ask the person questions if the he/she does not elaborate much. Try to listen to if speech rate, phrase length, pauses, intonation or stress is deviating. Is there palilalia?

### Instruction to the patient:

"Now tell me about something you like to do or something you are interested in"

| <u>Speech rate</u>  |   | <u>Phrase length</u> |   | <u>Pauses</u>    |   |
|---------------------|---|----------------------|---|------------------|---|
| Normal              | — | Normal               | — | Normal           | — |
| Slow                | — | Too short            | — | Unmotivated      | — |
| Fast                | — | Too long             | — | Prolonged        | — |
| Increasing          | — | Varying              | — |                  |   |
| Decreasing          | — |                      |   |                  |   |
| Varying             | — |                      |   |                  |   |
|                     |   |                      |   |                  |   |
| <u>Stress</u>       |   | <u>Intonation</u>    |   | <u>Palilalia</u> |   |
| Normal              | — | Normal               | — | Present          | — |
| Monotone            | — | Monotone             | — | Not present      | — |
| Equalized           | — | Stereotype           | — |                  |   |
| Excessively varying | — | Excessively varying  | — |                  |   |

If the assessment is done in a tone language, the interpreter should also be asked the questions below

| <u>Contrasting tone</u> | Which contrasting tones are deviating (if occurring)? |
|-------------------------|-------------------------------------------------------|
| Normal —                |                                                       |
| Deviating —             |                                                       |

## Listener comprehension

Assessed by the interpreter

”Circle the number that best describes how easy or difficult it is for you to understand what the person says”

*0= no difficulties to understand*

**0 1 2 3**

*1= some difficulties to understand*

*2= moderate difficulties to understand*

*3= severe difficulties to understand*

## Listener comprehension

Assessed by significant other (if present)

"Circle the number that best describes how easy or difficult it is for you to understand what your significant other says"

0= no difficulties to understand

**0 1 2 3**

1= some difficulties to understand

2= moderate difficulties to understand

3= severe difficulties to understand

**The persons own rating of to what degree other people understand the person's speech**

"Circle the number that best describes how easy or difficult it is for other people to understand what you say"

*0= other people have no difficulties understanding what I say*

**0 1 2 3**

*1= other people have some difficulties understanding what I say*

*2= It is quite difficult for other people to understand what I say*

*3= other people have major difficulties understanding what I say*

The speech-language pathologist's assessment in summary and description of the most prominent perceptual deviations, possible dysarthria type if it can be determined, how easy or difficult it is to understand the person's spontaneous speech and degree of speech deviation:

**Listener comprehension in spontaneous speech    0   1   2   3**

*0= no difficulties understanding*

*1= some difficulties understanding*

*2= moderate difficulties understanding*

*3= severe difficulties understanding*

**Degree of speech deviation    0   1   2   3**

*0 = no deviation*

*1 = mild deviation*

*2 = moderate deviation*

*3 = severe deviation*
